1 **A novel B.1.1.523 SARS-CoV-2 variant that combines many spike mutations**  
2 **linked to immune evasion with current variants of concern**

3 Brian M.J.W. van der Veer<sup>1</sup>, Jozef Dingemans<sup>1</sup>, Lieke B. van Alphen<sup>1</sup>, Christian J.P.A. Hoebe<sup>1,2,3</sup>, Paul  
4 H.M. Savelkoul<sup>1</sup>

5  
6 <sup>1</sup> Department of Medical Microbiology, Care and Public Health Research Institute (CAPHRI),  
7 Maastricht University Medical Center+, Maastricht, Netherlands.

8 <sup>2</sup> Department of Sexual Health, Infectious Diseases and Environment, South Limburg Public Health  
9 Service, Heerlen, The Netherlands.

10 <sup>3</sup> Department of Social Medicine, Maastricht University, Care and Public Health Research Institute  
11 (CAPHRI), Maastricht University Medical Center+, Maastricht, The Netherlands.

12

13 Corresponding Author:

14 Dr. Brian van der Veer

15 Department of Medical Microbiology, Maastricht University Medical Centre (MUMC+), Maastricht,  
16 The Netherlands.

17 P. Debyelaan 25, 6229 HX Maastricht

18 Tel: +31 (0)43 3876668

19 brian.vander.veer@mumc.nl

20

## 21 Abstract

22 In the severe acute respiratory syndrome coronavirus 2 (SARS-CoV-2) pandemic several variants  
23 have emerged that are linked to increased transmissibility and immune evasion. These variants are  
24 recognized as variants of concern (VOC). In this study, we describe a B.1.1.523 variant that shares  
25 many spike mutations with current VOC. Receptor-binding domain mutations E484K and S494P were  
26 observed but also a deletion (position 156-158) in the N-terminal antigenic supersite that is similar  
27 to the delta-variant. These mutations are linked to immune evasion in VOC that could lead to less  
28 effective vaccines. This variant has been reported in various different countries and continents  
29 despite the dominance of B.1.1.7 (alpha) and B.1.617.2 (delta) variant. Furthermore, the B.1.1.523  
30 pangolin lineage as a whole is recognized as a variant under monitoring since 14<sup>th</sup> of July 2021.

## 31 Introduction

32 Severe acute respiratory syndrome coronavirus 2 (SARS-CoV-2) infected millions of people during  
33 the pandemic <sup>1,2</sup>. During this pandemic, various variants of this virus were detected in surveillance  
34 and were linked with increased infectivity or immune evasion <sup>3,4</sup>. Data of these variants are shared  
35 via the GISAID (Global initiative on sharing all influenza data) database that helps to understand  
36 spread and evolution of SARS-CoV-2. The Centers for Disease Control and Prevention (CDC) and  
37 European Centre for Disease Prevention and Control (ECDC) assign certain variants as “variant of  
38 concern” (VOC) because of an increase in transmissibility, more severe disease, or immune evasion  
39 <sup>5,6</sup>. Current VOC are B.1.1.7 (alpha-variant), B.1.351 (beta-variant), P1 (gamma-variant), and  
40 B.1.617.2 (delta-variant). These VOC harbor several spike protein mutations linked to immune  
41 evasion. The receptor-binding domain (RBD) and N-terminal domain (NTD) are frequently targeted  
42 by neutralizing antibodies mostly directed to the NTD <sup>7,8</sup>. In addition, a so called antigenic supersite  
43 is described in the NTD with three regions. Potent neutralizing antibodies in convalescent plasma  
44 target this antigenic super site. Still, mutations in the RBD are important as for example E484K  
45 mutation is also strongly linked with immune evasion <sup>3,4</sup>. This short communication describes a new  
46 variant with a new combination of various concerning spike mutations shared with VOCs and is  
47 already spread across many countries. The pangolin lineage of this variant is B.1.1.523 and is  
48 recognized as a variant under monitoring since 14<sup>th</sup> of July 2021 <sup>9</sup>.

## 49 Methods

### 50 GISAID data download and SARS-CoV-2 sequencing

51 All sequences and metadata of B.1.1.523 variant cases with spike mutations S:E156del, S:F157del,  
52 S:R158del, S:E484K, and S:S494P were downloaded from [www.gisaid.org](http://www.gisaid.org) on 19 August 2021 (n=551).  
53 These mutations were chosen because of links with immune evasion. Of these cases 18 were  
54 removed based on bad quality score in Nextclade ([clades.nextstrain.org](http://clades.nextstrain.org)). In routine SARS-CoV-2  
55 surveillance one case of this B.1.1.523 variant was identified with nanopore sequencing as described  
56 in von Wintersdorff et al. 2021 <sup>10</sup>.

### 57 Data-analysis

58 Visualization of the filtered data by country, month, and age group were made in R statistical  
59 software, version 3.6.2 (R Foundation for Statistical Computing, Vienna, Austria). Figures were made

60 using the R package ggplot2 version 3.3.2. Phylogenetic analysis was performed as described in von  
61 Wintersdorff et al. 2021 but with nextstrain/ncov version 7 (<https://github.com/nextstrain/ncov>)<sup>10</sup>.  
62 The amino acid sequence of Wuhan strain, VOC, and B.1.1.523 variant were aligned in MEGA v10.0.5  
63 with Cluster Omega algorithm, with the Wuhan strain as a reference. The 3D structure of the spike  
64 protein of the B.1.1.523 variant was predicted using CoVServer ([https://www.gisaid.org/epiflu-  
65 applications/covserver-mutations-app/](https://www.gisaid.org/epiflu-applications/covserver-mutations-app/))

## 66 Results

67 In total, 533 cases of B.1.1.523 with spike mutations S:E156del, S:F157del, S:R158del, S:E484K, and  
68 S494P are reported in GISAID till 19 August 2021. Most cases are reported in Russia followed by  
69 Germany but cases have also been seen in the USA and Australia (figure 1A). The first few cases were  
70 collected in February 2021 and increased in numbers to 203 cases in May 2021 (figure 1B). Number  
71 of cases is lower in June and July 2021 as sequenced-based surveillance data is typically lagging. This  
72 variant did not show an age related pattern (figure 1C).

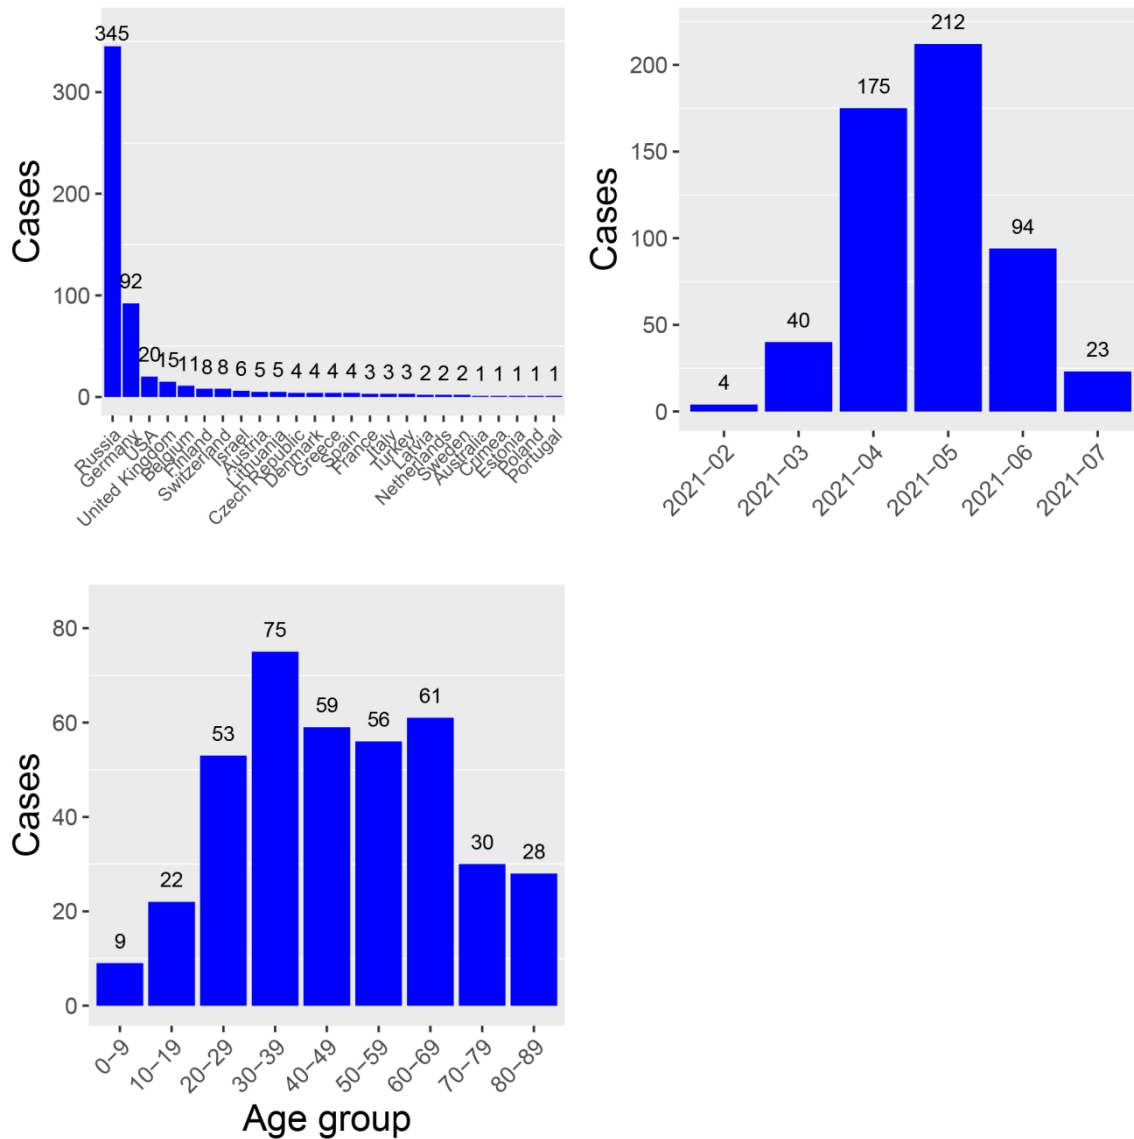

73

74 *Figure 1* (A) Number of cases per country. (B) number of cases per month, note that data of June and July are incomplete  
 75 as surveillance is typically lagging. (C) Cases per age group.

76

77 Sharing of the pangolin lineage and some spike mutations does not necessarily imply a single origin  
 78 of this variant. Also, recognition of the first cases in Russia does not necessarily implicate that this  
 79 variant originates from this country. To address both issues a phylogenetic tree was constructed and  
 80 showed that all cases are similar as they are in the same branch (figure 2). Based on this  
 81 phylogenetic analysis the origin of this variant is likely Russian as the first strain is reported from  
 82 Moscow (green circle at 30 mutations (EPI\_ISL\_1823183), figure 2).

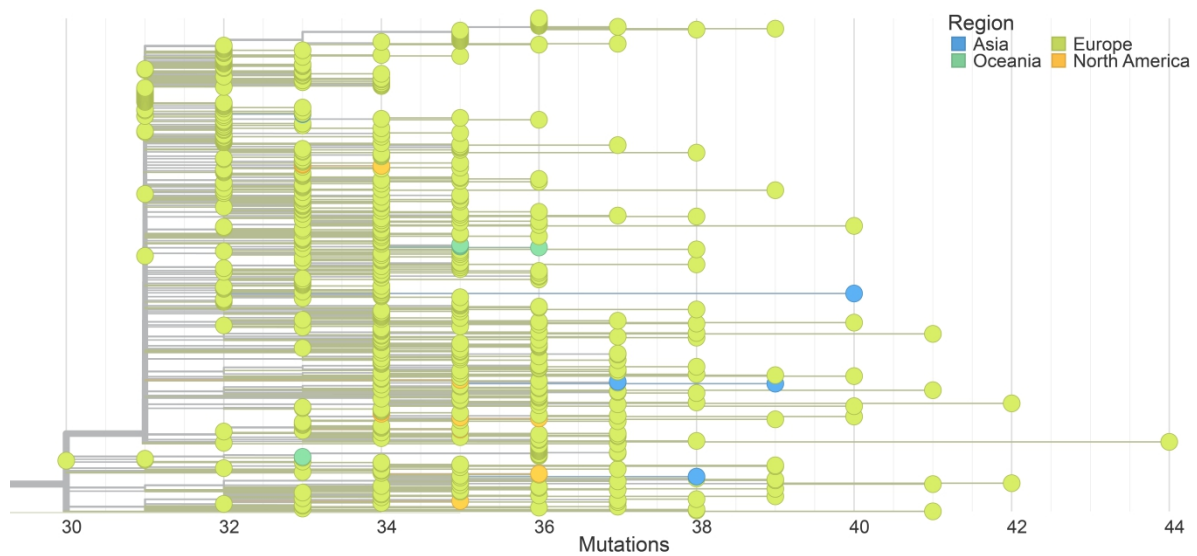

83

84 *Figure 2* Phylogenetic analysis of cases of B.1.1.523 lineage with S:E156del, S:F157del, S:R158del, S:E484K, and S:S494P.

85 One of the reasons of concern about this variant is a three amino acid deletion in the NTD antigenic  
86 supersite and E484K mutation of the spike protein. Therefore a multiple sequence alignment (MSA)  
87 was performed with the amino acid sequence of VOC and Wuhan-Hu-1 (figure 3A). Three VOC,  
88 B.1.1.7, B.1.351, and B.1.617.2, have deletions in one of the regions of the NTD antigenic supersite.  
89 The deletion of B.1.1.523 is similar to the one of B.1.617.2 and has the E484K mutation that is shared  
90 in many VOC. In figure 3B the predicted spike structure and interaction with human ACE2 receptor is  
91 shown. Spike mutations E484K and S494P are both in the RBD with the ACE2 receptor.

92

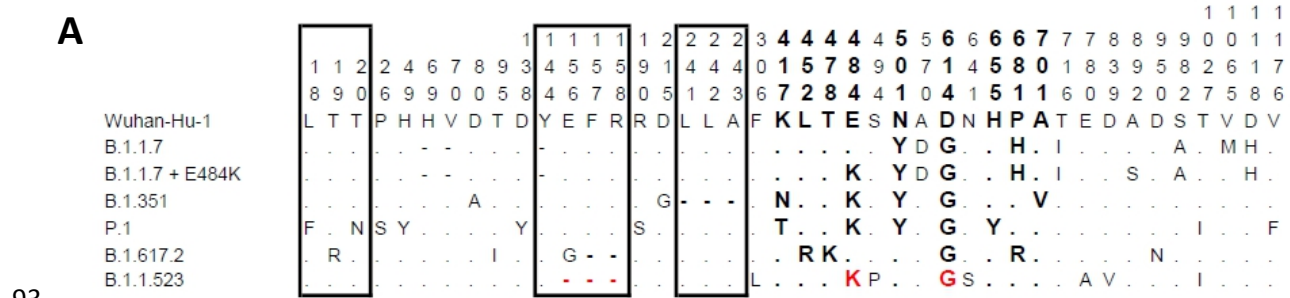

93  
94

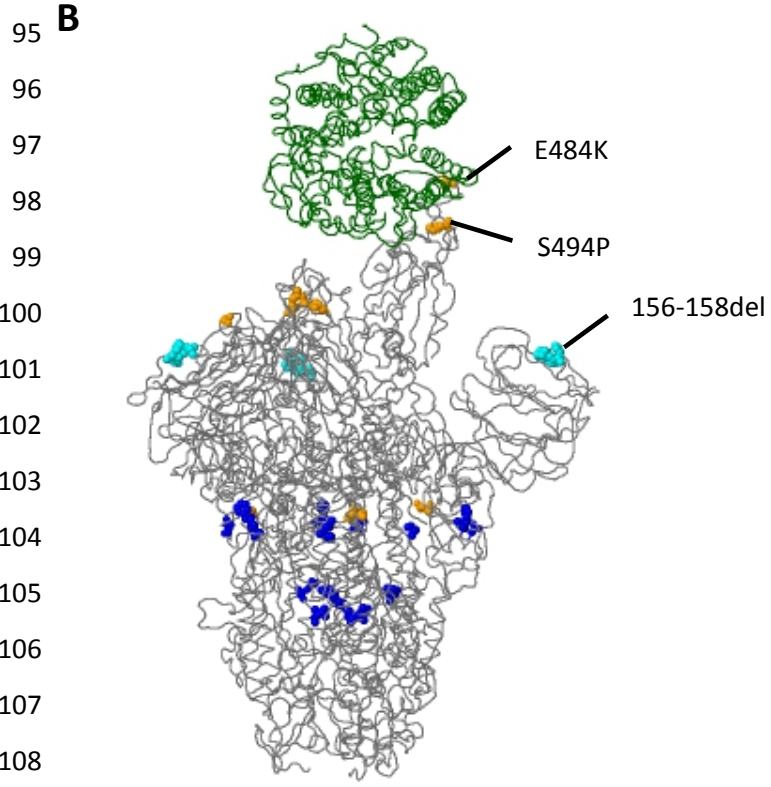

109 *Figure 3 (A)* Multiple sequence alignment of the spike protein of Wuhan strain, variants of concern, and B.1.1.523 lineage.  
 110 In bold are spike mutations linked to increased infectivity or immune evasion in variants of concern. In red are the  
 111 mutations (or position) in B.1.1.523 that is shared with variants of concern. The block boxes represent mutations in the  
 112 antigenic supersite of the N-terminal domain of the spike protein. (B) Predicted 3D-structure of the spike protein of the  
 113 B.1.1.523 lineage using CoVSurver.

114  
115 **Discussion**

116 In this short communication we report a variant (B.1.1.523) with a new combination of concerning  
 117 spike mutations that are shared with current VOCs. Many of these mutations are linked with  
 118 immune evasion that could lead to less effective vaccines. This variant has been reported in various  
 119 different countries and continents and likely originates in Russia. In addition, the number of cases  
 120 appears to increase despite the dominant variants B.1.1.7 (alpha) and B.1.617.2 (delta).

121 Mutations that are shared with VOC or linked with immune evasion were S:E156del, S:F157del,  
 122 S:R158del, S:E484K, and S:S494P<sup>5,6,11</sup>. Two mutations are in the RBD of the spike protein, positions  
 123 484 and 494, and are both linked to immune evasion in B.1.1.7 (alpha) variant. E484K mutation is

124 also present B.1.351 (beta) and P.1 (gamma) variants that are strongly linked with reduced efficacy  
125 of vaccines<sup>3,4</sup>. These findings are supported in studies where the effect of spike mutations on  
126 efficacy of monoclonal antibodies and convalescent plasma was investigated<sup>12</sup>. Similar studies were  
127 performed to investigate the antigenic super site of the NTD<sup>7,8</sup>. In the  $\beta$ -hairpin region of the  
128 antigenic super site the B.1.1.523 variant has a deletion (position 156-158) similar to the currently  
129 dominant B.1.617.2 (delta) variant (S:E156G and 157-158del)<sup>5-8</sup>. Other VOC also have deletions in  
130 one of the regions of the antigenic super site, B.1.1.7 (alpha-variant) position 144 and B.1.351 (beta-  
131 variant) position 241-243. As the mutations observed in this B.1.1.523 variant are strongly linked to  
132 immune evasion and disseminated to different continents, despite the dominance of both the  
133 B.1.1.7 (alpha) and B.1.617.2 (delta) variants, this could be a variant of interest and should be  
134 monitored closely. However, as this is the first study that describes this variant of the B.1.1.523  
135 lineage, there is yet no information on transmissibility that contributes to the need of actions  
136 required to prevent dissemination.

## 137 References

- 138 1 Li, Q. *et al.* Early Transmission Dynamics in Wuhan, China, of Novel Coronavirus-Infected  
139 Pneumonia. *N Engl J Med* **382**, 1199-1207, doi:10.1056/NEJMoa2001316 (2020).
- 140 2 WHO. *Coronavirus (COVID-19) Dashboard*, < <https://covid19.who.int/>> (2021).
- 141 3 Peacock, T. P., Penrice-Randal, R., Hiscox, J. A. & Barclay, W. S. SARS-CoV-2 one year on:  
142 evidence for ongoing viral adaptation. *J Gen Virol* **102**, doi:10.1099/jgv.0.001584 (2021).
- 143 4 Harvey, W. T. *et al.* SARS-CoV-2 variants, spike mutations and immune escape. *Nat Rev*  
144 *Microbiol*, doi:10.1038/s41579-021-00573-0 (2021).
- 145 5 Center for Disease Control and Prevention. SARS-CoV-2 Variant Classifications and  
146 Definitions. <https://www.cdc.gov/coronavirus/2019-ncov/variants/variant-info.html>  
147 assessed 27 August 2021
- 148 6 European Centre for Disease Prevention and Control. SARS-CoV-2 variants of concern.  
149 <https://www.ecdc.europa.eu/en/covid-19/variants-concern> assessed 27 August 2021
- 150 7 McCallum, M. *et al.* N-terminal domain antigenic mapping reveals a site of vulnerability for  
151 SARS-CoV-2. *Cell* **184**, 2332-2347 e2316, doi:10.1016/j.cell.2021.03.028 (2021).
- 152 8 Suryadevara, N. *et al.* Neutralizing and protective human monoclonal antibodies recognizing  
153 the N-terminal domain of the SARS-CoV-2 spike protein. *Cell* **184**, 2316-2331 e2315,  
154 doi:10.1016/j.cell.2021.03.029 (2021).
- 155 9 World Health Organisation. Tracking SARS-CoV-2 variants.  
156 <https://www.who.int/en/activities/tracking-SARS-CoV-2-variants/> assessed 16 September  
157 2021
- 158 10 von Wintersdorff, C.J.H., van Alphen, L.B., Wolffs, P.F.G., van der Veer, B.M.J.W., Hoebe,  
159 C.J.P.A., Savelkoul, P.H.M.. Infections caused by the Delta variant (B.1.617.2) of SARS-CoV-2  
160 are associated with increased viral loads compared to infections with the Alpha variant  
161 (B.1.1.7) or non-Variants of Concern. *Research Square*, doi:10.21203/rs.3.rs-777577/v1  
162 (2021).
- 163 11 Greaney, A. J. *et al.* Complete Mapping of Mutations to the SARS-CoV-2 Spike Receptor-  
164 Binding Domain that Escape Antibody Recognition. *Cell Host Microbe* **29**, 44-57 e49,  
165 doi:10.1016/j.chom.2020.11.007 (2021).
- 166 12 Weisblum, Y. *et al.* Escape from neutralizing antibodies by SARS-CoV-2 spike protein  
167 variants. *Elife* **9**, doi:10.7554/eLife.61312 (2020).

168  
169
